# Supplementary material for: Antarctic sub-shelf melt rates via PICO
Source: Copernicus journal article supplement (doi:10.5194/tc-12-1969-2018), 2018-06-12
Supplement: Supplementary file 1 [file SupplementaryInformation.pdf › SupplementaryInformation/SupplementaryInformation.pdf]

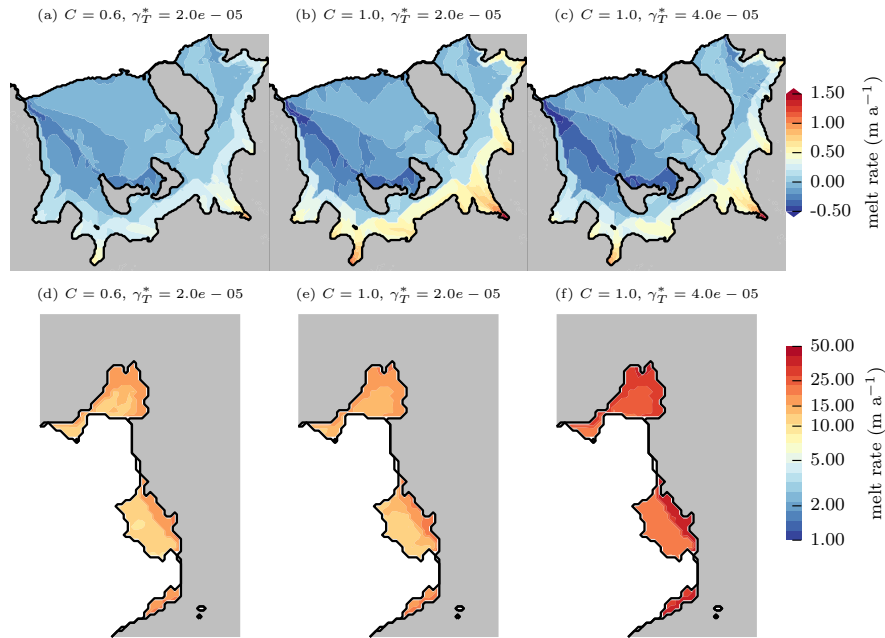

**Figure S.1.** Basal melt rates in the Filchner-Ronne (upper panels) and Amundsen Sea (lower panels) regions for different parameter combinations of the overturning strength  $C$  and the effective turbulent heat transfer coefficient  $\gamma_T^*$ . Grounded ice regions are shown in grey.

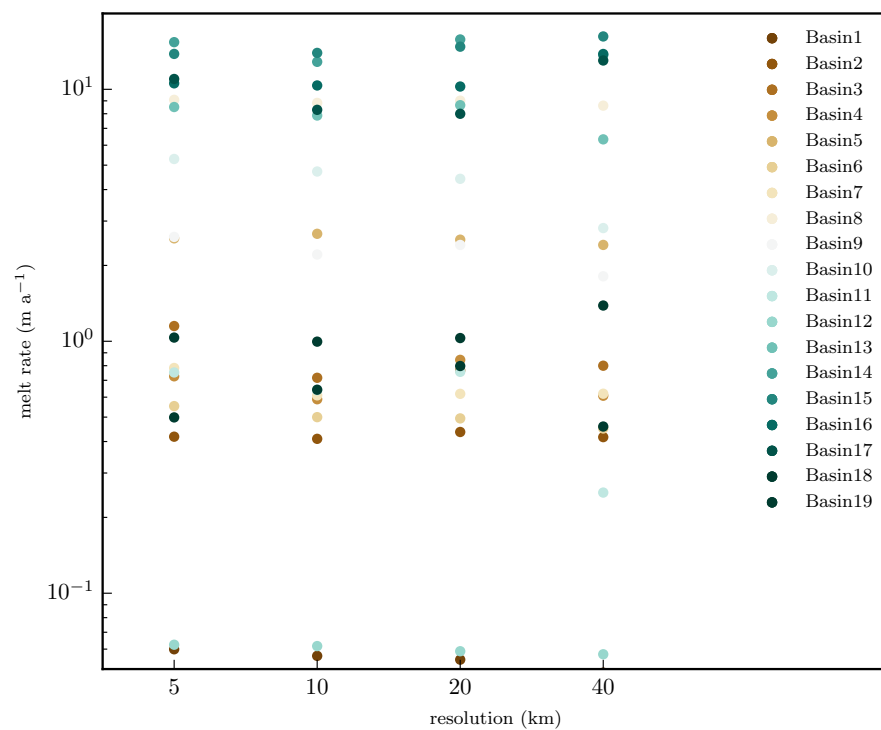

**Figure S.2.** Sensitivity of mean sub-shelf melt rates to the ice-sheet model resolution.

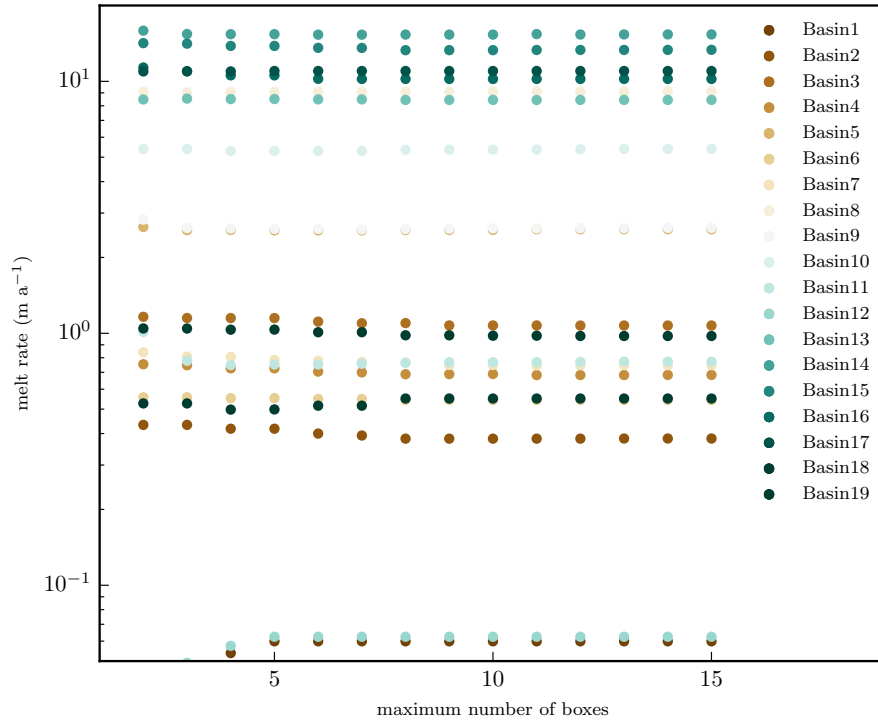

**Figure S.3.** Sensitivity of mean sub-shelf melt rates to the maximum number of boxes of PICO.

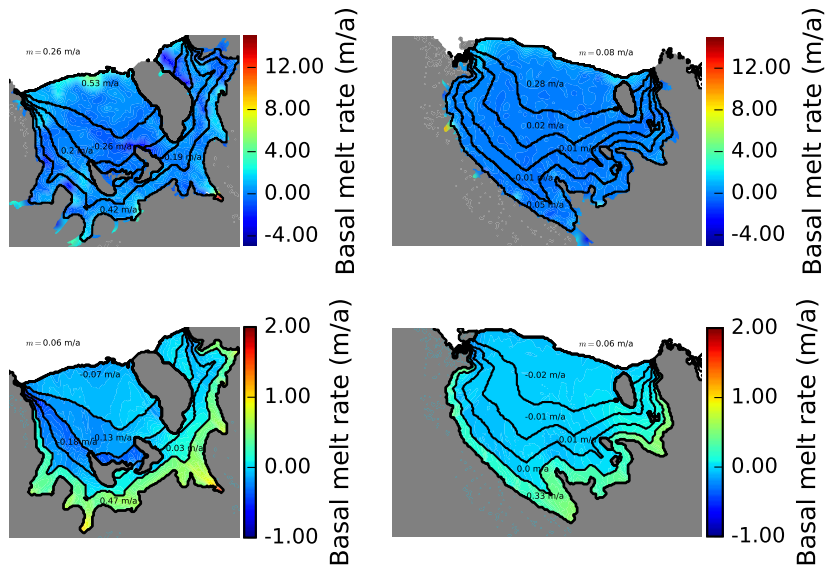

**Figure S.4.** Comparison of observed sub-shelf melt rates (upper row) from (Moholdt et al., 2016) with melt rates modelled by PICO (lower row) for Filchner-Ronne (left column) and Ross ice shelves (right column). Black contour lines indicate the PICO ocean boxes with annotations giving the box-wide average melt rates respectively. PICO tends to distribute melting, such that melt rate deviations are at a lower order of magnitude than in the observations. Nevertheless, box-wide averages show reasonable agreement.



**Table S.1.** Results from the reference simulation as displayed in Fig. 5.

| basin          | $m_{\Sigma}$       | $m_{\min}$        | $m_{\max}$        | $q$  | $m_{\Sigma}/q$ | $Q_{in}$           | $Q_{out}$          | $Q_m$              | $Q_{\Delta}$       | $Q_{\Delta}/Q_m$ | $b_1$ |
|----------------|--------------------|-------------------|-------------------|------|----------------|--------------------|--------------------|--------------------|--------------------|------------------|-------|
|                | Gt a <sup>-1</sup> | m a <sup>-1</sup> | m a <sup>-1</sup> | Sv   | %              | TJ s <sup>-1</sup> | TJ s <sup>-1</sup> | GJ s <sup>-1</sup> | GJ s <sup>-1</sup> | %                | m     |
| Wilkins(*)     | 320                | 0.26              | 19.80             | 0.32 | 3.06           | 361.30             | 357.90             | 3382.50            | 19.06              | 0.56             | 272   |
| Pine Island    | 61                 | 12.39             | 21.01             | 0.17 | 1.11           | 188.51             | 187.87             | 645.56             | 2.68               | 0.41             | 439   |
| Thwaites       | 53                 | 11.44             | 20.90             | 0.13 | 1.27           | 143.41             | 142.85             | 560.51             | 1.13               | 0.20             | 438   |
| Getz           | 112                | 2.48              | 10.78             | 0.23 | 1.48           | 260.10             | 258.90             | 1189.23            | 13.98              | 1.18             | 494   |
| Drygalski      | 1                  | 0.01              | 3.51              | 0.02 | 0.23           | 17.33              | 17.32              | 12.50              | -0.16              | -1.28            | 293   |
| Cook           | 7                  | 0.70              | 5.25              | 0.05 | 0.38           | 60.87              | 60.80              | 72.20              | -0.10              | -0.14            | 458   |
| Ninnis         | 4                  | 1.08              | 6.61              | 0.04 | 0.31           | 48.80              | 48.75              | 47.19              | -0.08              | -0.17            | 514   |
| Mertz          | 6                  | 0.38              | 4.60              | 0.04 | 0.45           | 43.27              | 43.21              | 60.18              | -0.14              | -0.23            | 309   |
| Totten         | 29                 | 5.93              | 14.33             | 0.13 | 0.70           | 144.10             | 143.79             | 309.81             | 1.06               | 0.34             | 677   |
| Shackleton     | 9                  | -0.21             | 2.70              | 0.07 | 0.40           | 77.62              | 77.52              | 96.93              | 0.48               | 0.50             | 270   |
| West           | 9                  | -0.08             | 5.26              | 0.07 | 0.38           | 78.82              | 78.73              | 93.34              | -0.17              | -0.18            | 428   |
| Amery          | 25                 | -1.22             | 5.93              | 0.16 | 0.49           | 175.86             | 175.58             | 269.19             | 11.89              | 4.42             | 674   |
| Baudouin       | 22                 | -0.25             | 2.73              | 0.12 | 0.59           | 128.92             | 128.68             | 234.16             | 7.03               | 3.00             | 325   |
| Fimbul         | 19                 | -0.25             | 2.97              | 0.10 | 0.57           | 115.85             | 115.64             | 204.02             | 5.79               | 2.84             | 303   |
| Riiser-Larsen  | 13                 | -0.22             | 1.83              | 0.09 | 0.46           | 94.92              | 94.78              | 136.36             | 3.84               | 2.82             | 273   |
| Brunt(**)      | 11                 | -0.16             | 2.30              | 0.08 | 0.40           | 93.81              | 93.69              | 117.21             | 3.31               | 2.83             | 250   |
| Filchner-Ronne | 21                 | -0.67             | 1.76              | 0.21 | 0.31           | 236.72             | 236.34             | 225.52             | 152.22             | 67.50            | 839   |
| Ross           | 25                 | -0.24             | 0.62              | 0.17 | 0.44           | 191.38             | 191.01             | 262.62             | 113.98             | 43.40            | 411   |
| Antarctica     | 1718               | -1.22             | 26.91             | 8.51 | 0.62           | 9473.42            | 9454.84            | 18183.19           | 403.63             | 2.22             | -     |

For each ice shelf,  $m_{\Sigma}$  is the aggregated melt rate over the entire ice shelf,  $m_{\min}$  the minimum and  $m_{\max}$  the maximum melt rate within that shelf,  $q$  the overturning flux computed as average over box  $B_1$ ,  $m_{\Sigma}/q$  estimates the error in mass flux introduced by assuming constant overturning;  $Q_{in} = T_0 \times q \times c_p \times \rho_w$  is the heat flux from box  $B_0$  in box  $B_1$ ,  $Q_{out} = T_n \times q \times c_p \times \rho_w$  the flux from the last box  $B_n$  adjacent to the shelf front into the ocean,  $Q_m = Lm_{\Sigma}$  the heat flux due to melting of ice,  $Q_{\Delta} = Q_{in} - Q_{out} - Q_m$  the error in the heat balance.  $Q_{\Delta}/Q_m$  is the error in the heat balance relative to the heat flux for melting which results from the non-linearity of the temperature solution in box  $B_1$ . The average depth of this box is given by  $b_1$ . (\*) includes also Stange, Bach and George VI ice shelves and (\*\*) also Stancomb Ice Shelf.

**Video. S.1.** Based on an Antarctic equilibrium state at 8km resolution comparable to the state submitted to initMIP (Nowicki et al., 2016), PISM+PICO is forced with time-dependent ocean temperature input: Starting from equilibrium conditions, ocean temperatures increase linearly over 50 years until an ocean-wide warming of  $1^{\circ}C$  is reached. It is then held constant over the next 250 model years. The movie shows the temporal evolution of the ocean temperature input for the ice shelf adjacent to Pine Island Glacier as well as the Filchner-Ronne Ice Shelf (upper left panel). The ocean temperature increase enhances the average sub-shelf melting for both ice shelves (lower left panel, shown in logarithmic scale) with the spatial distribution of the melt rates for both ice shelves on the right hand side. During the simulation, the melt rates in both areas increase, especially in the first box (upper right panel shows Filchner-Ronne Ice Shelf and lower right panel the Amundsen region). Ice-shelf thinning reduces buttressing and causes the grounding lines to retreat (for example near Foundation Ice Stream in Filchner-Ronne Ice Shelf) with the ocean boxes adjusting accordingly.
