# Supplementary material for: Antarctic sub-shelf melt rates via PICO
Source: Copernicus journal article supplement (doi:10.5194/tc-12-1969-2018), 2018-06-12
Supplement: Supplementary file [file tc-12-1969-2018-supplement-title-page.pdf › tc-12-1969-2018-supplement-title-page.pdf]

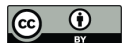

## *Supplement of*

# **Antarctic sub-shelf melt rates via PICO**

**R. Reese et al.**

*Correspondence to:* Ricarda Winkelmann ([ricarda.winkelmann@pik-potsdam.de](mailto:ricarda.winkelmann@pik-potsdam.de))

- [tc-12-1969-2018-supplement-title-page.pdf](#)
- [SupplementaryInformation](#)
  - [SupplementaryInformation.pdf](#)
  - [VideoS1.avi](#)

The copyright of individual parts of the supplement might differ from the CC BY 3.0 License.
